# Supplementary material for: RORγ is a targetable master regulator of cholesterol biosynthesis in a cancer subtype
Source: PubMed Central journal article supplement (PMC6789042; doi:10.1038/s41467-019-12529-3), 2019-10-11

**Fig.3**

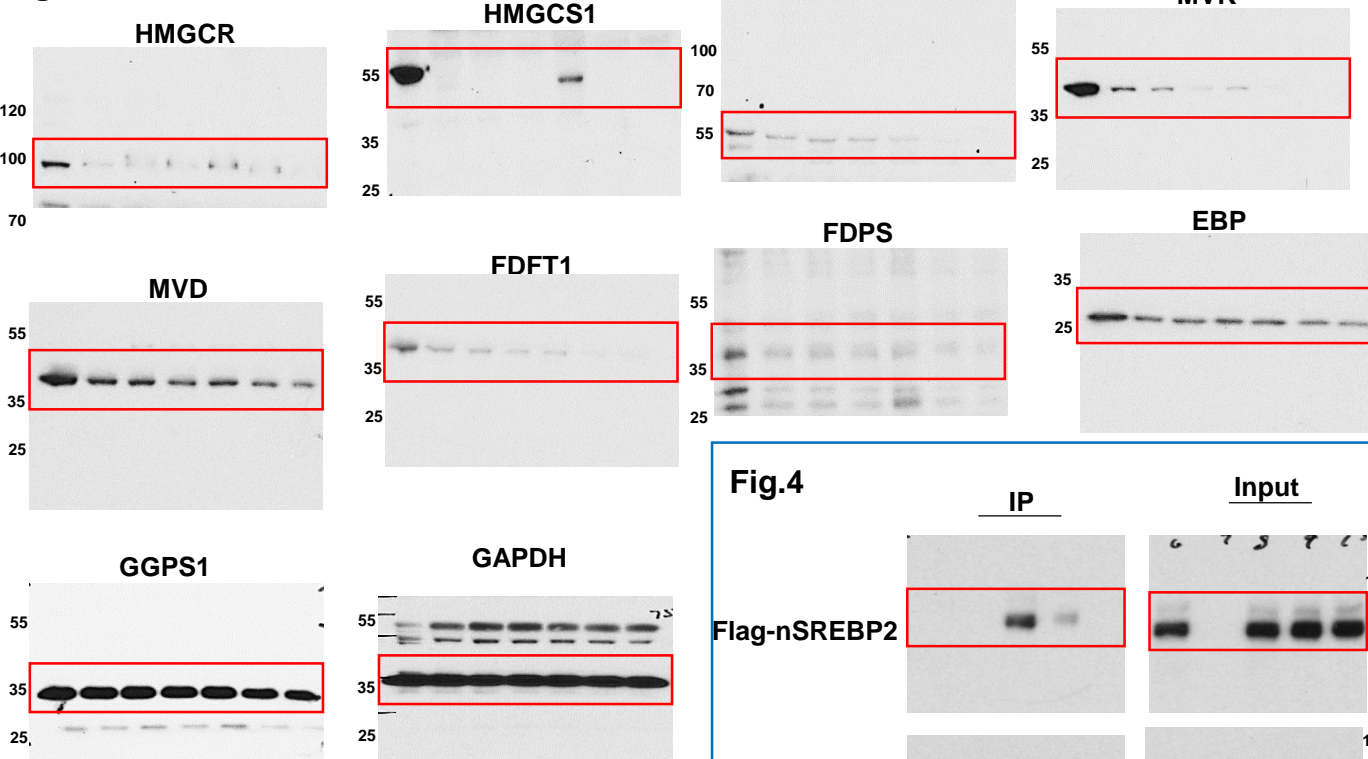

**Fig.4**

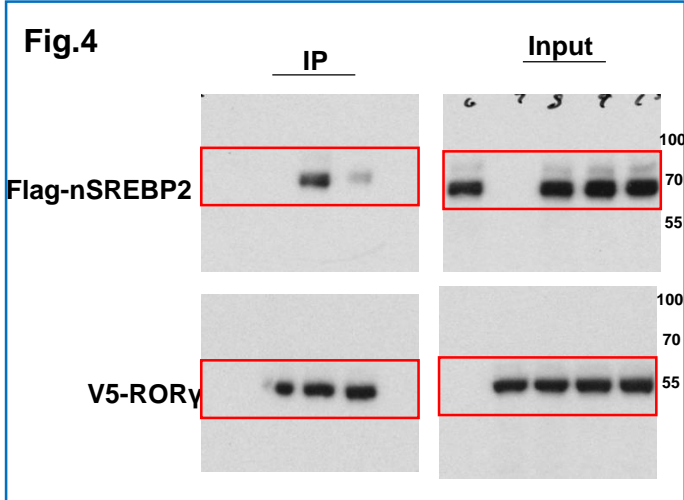

**Fig.5**

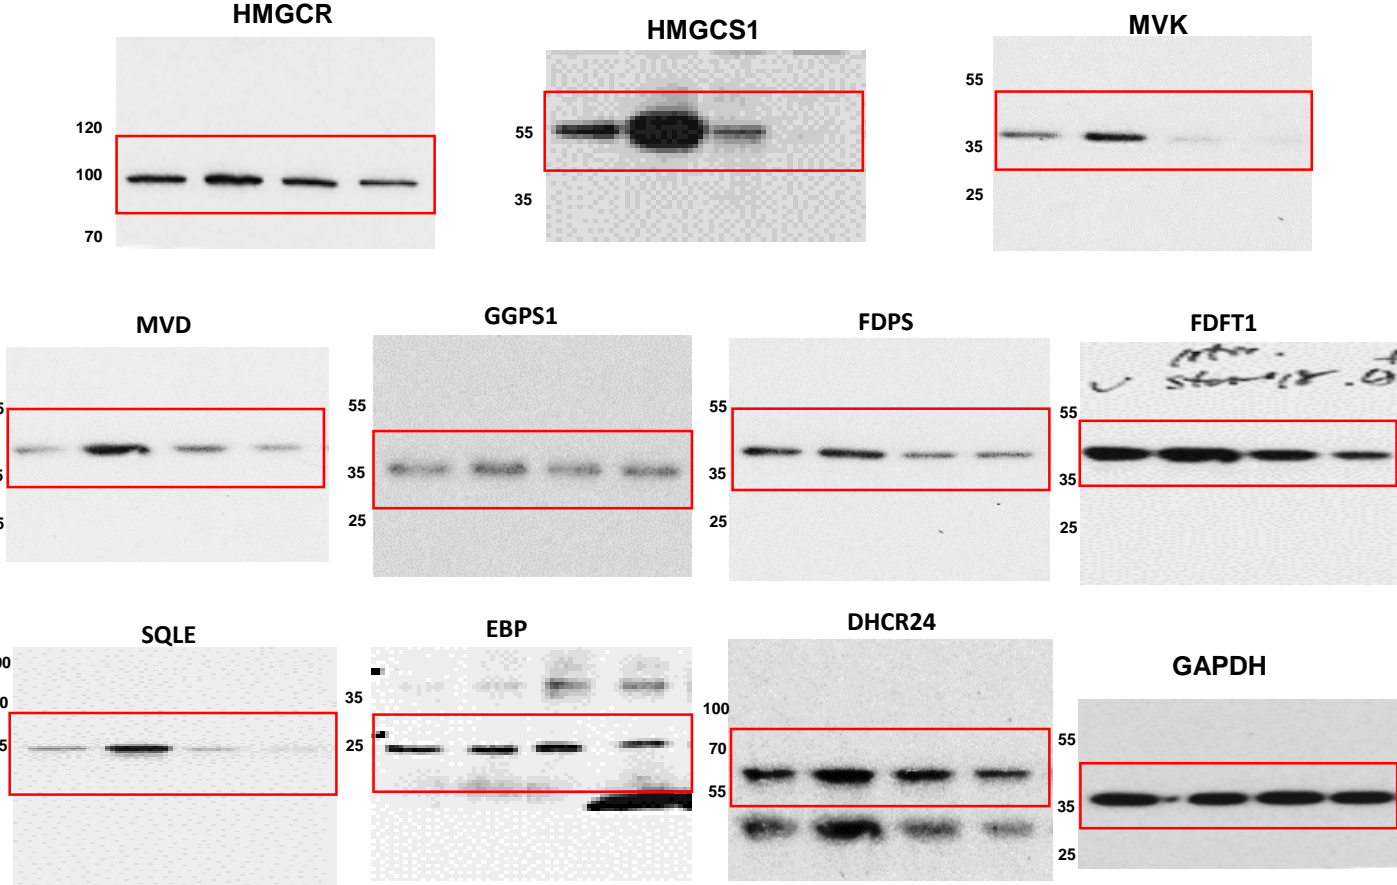

Supplementary Fig.2

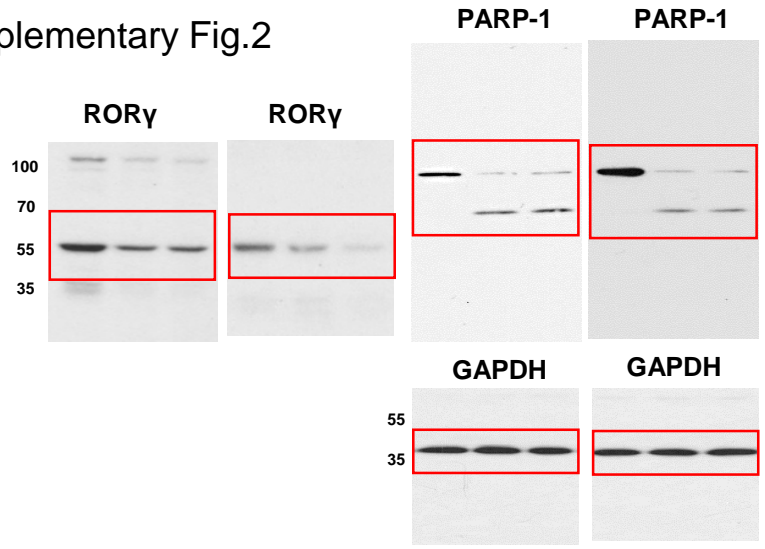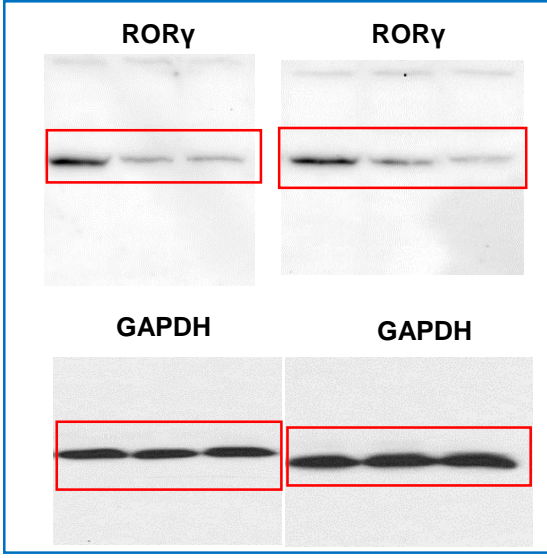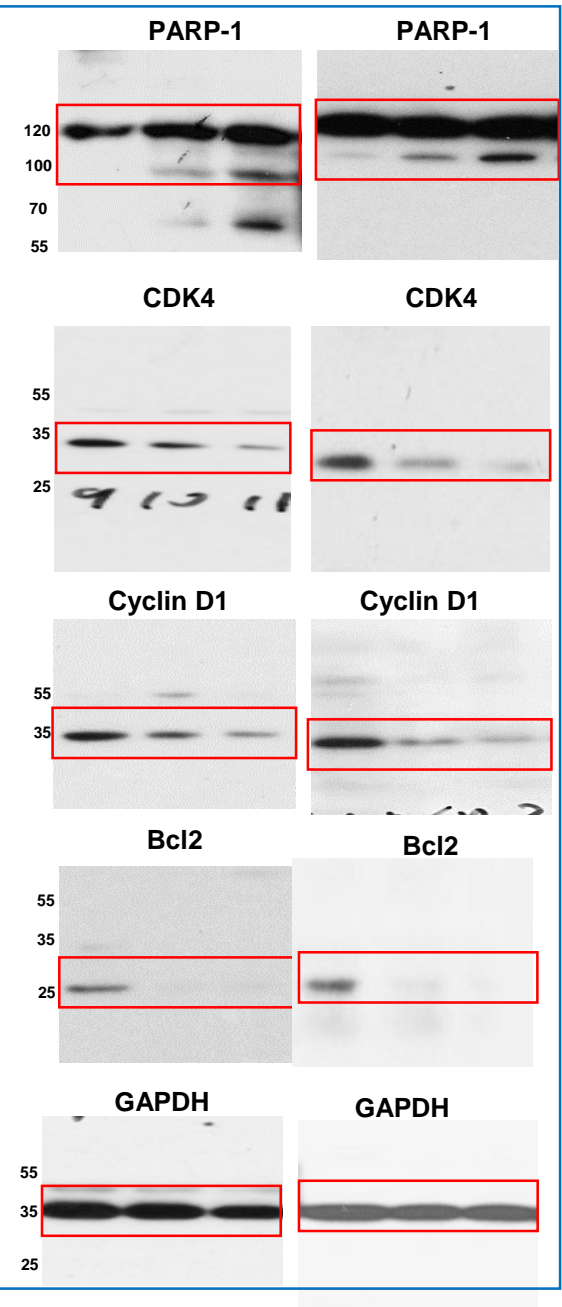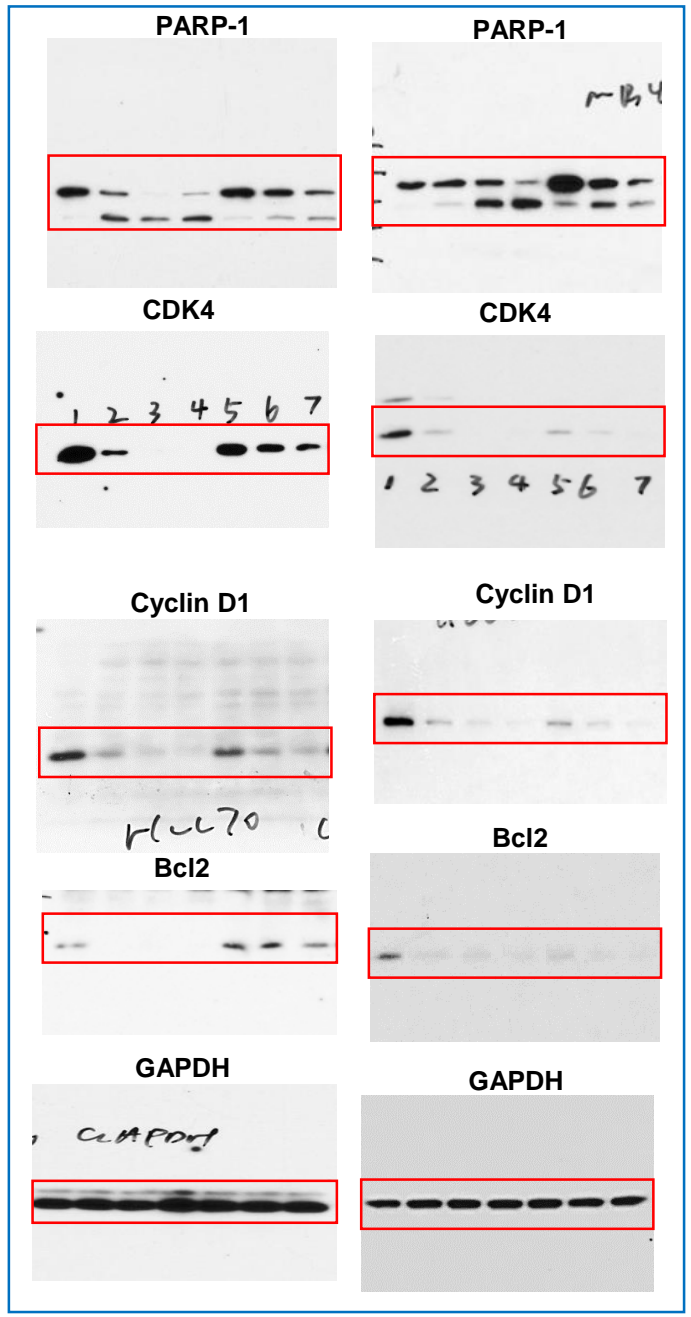

Supplementary Fig.2

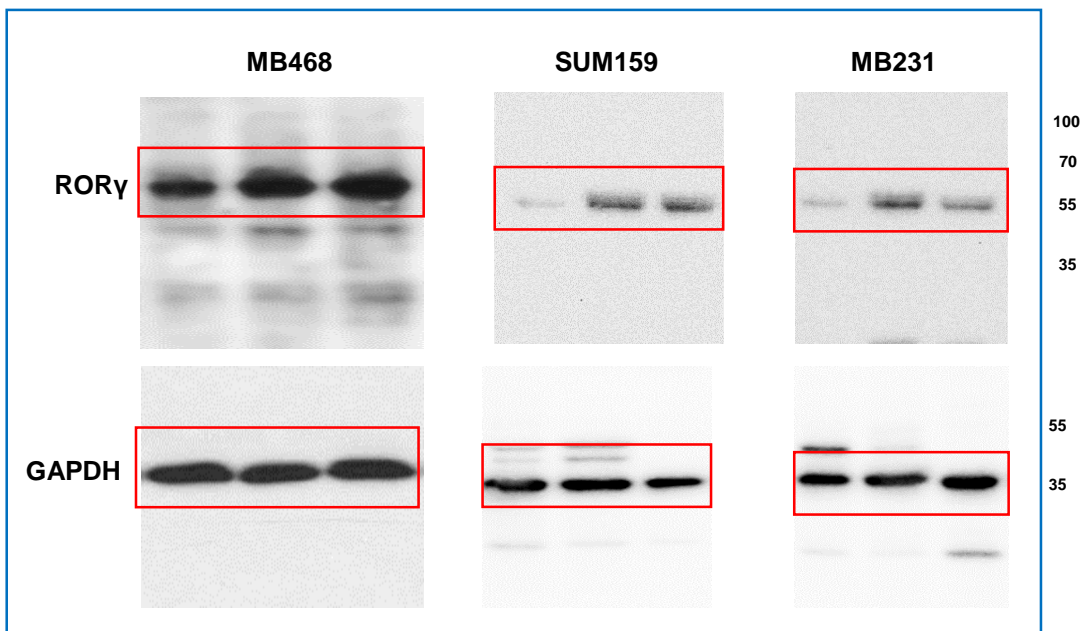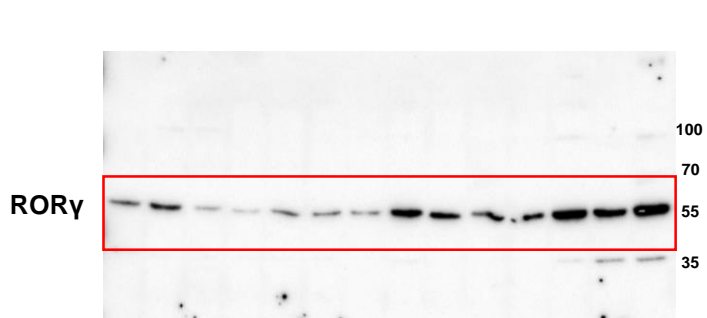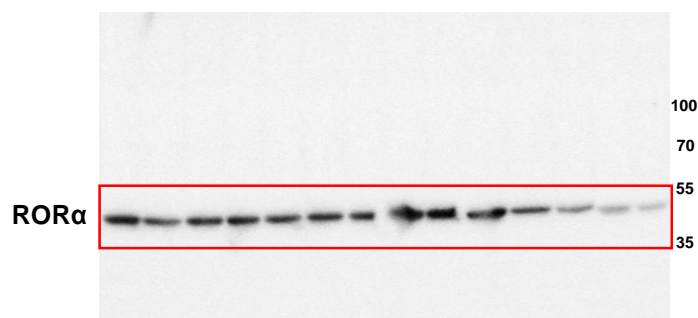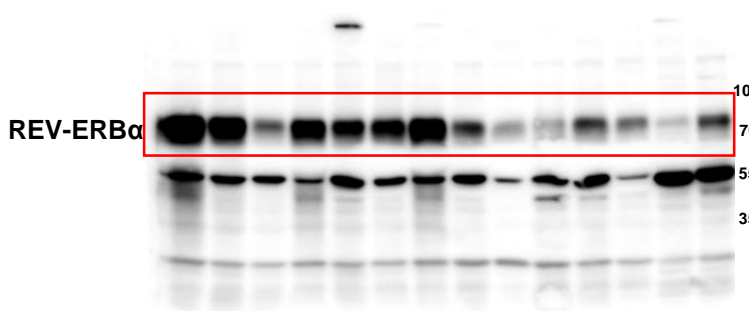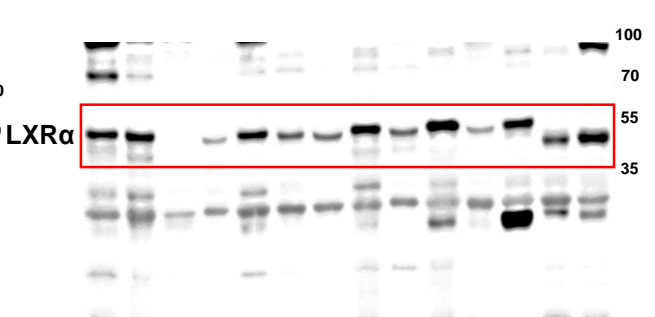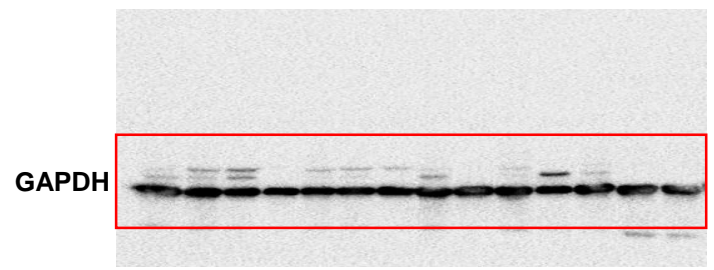

Supplementary Fig.3

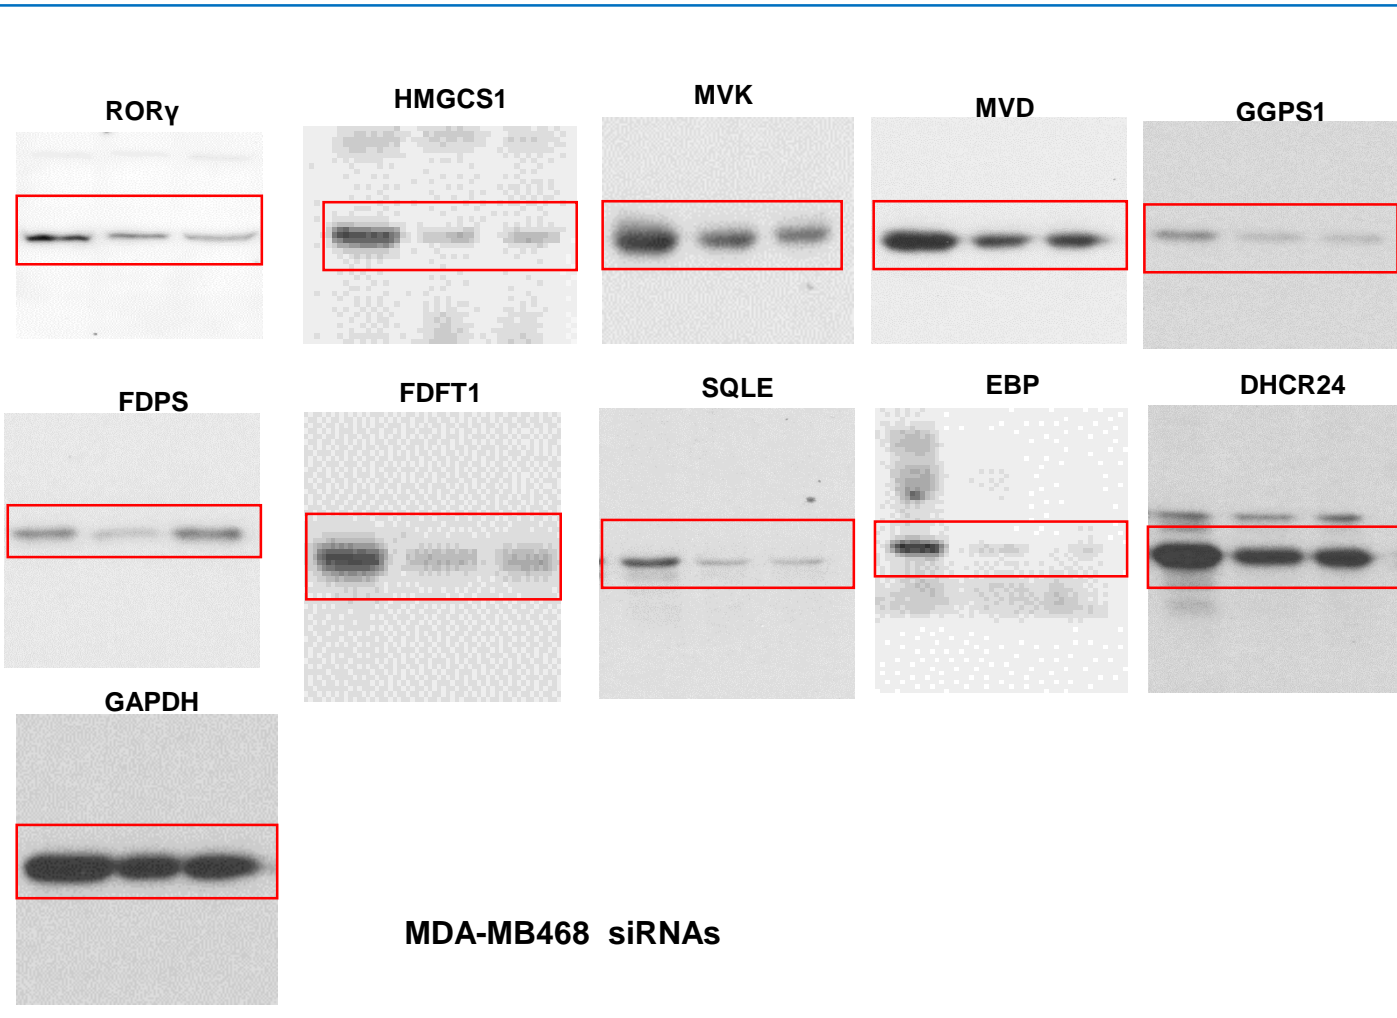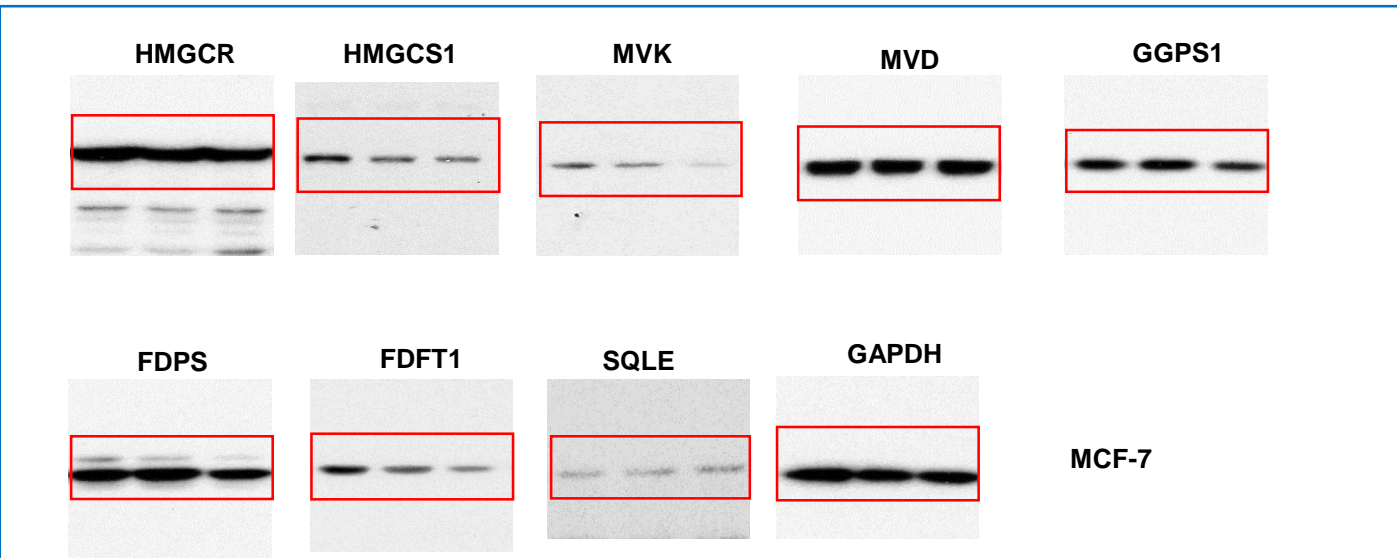

Supplementary Fig.4

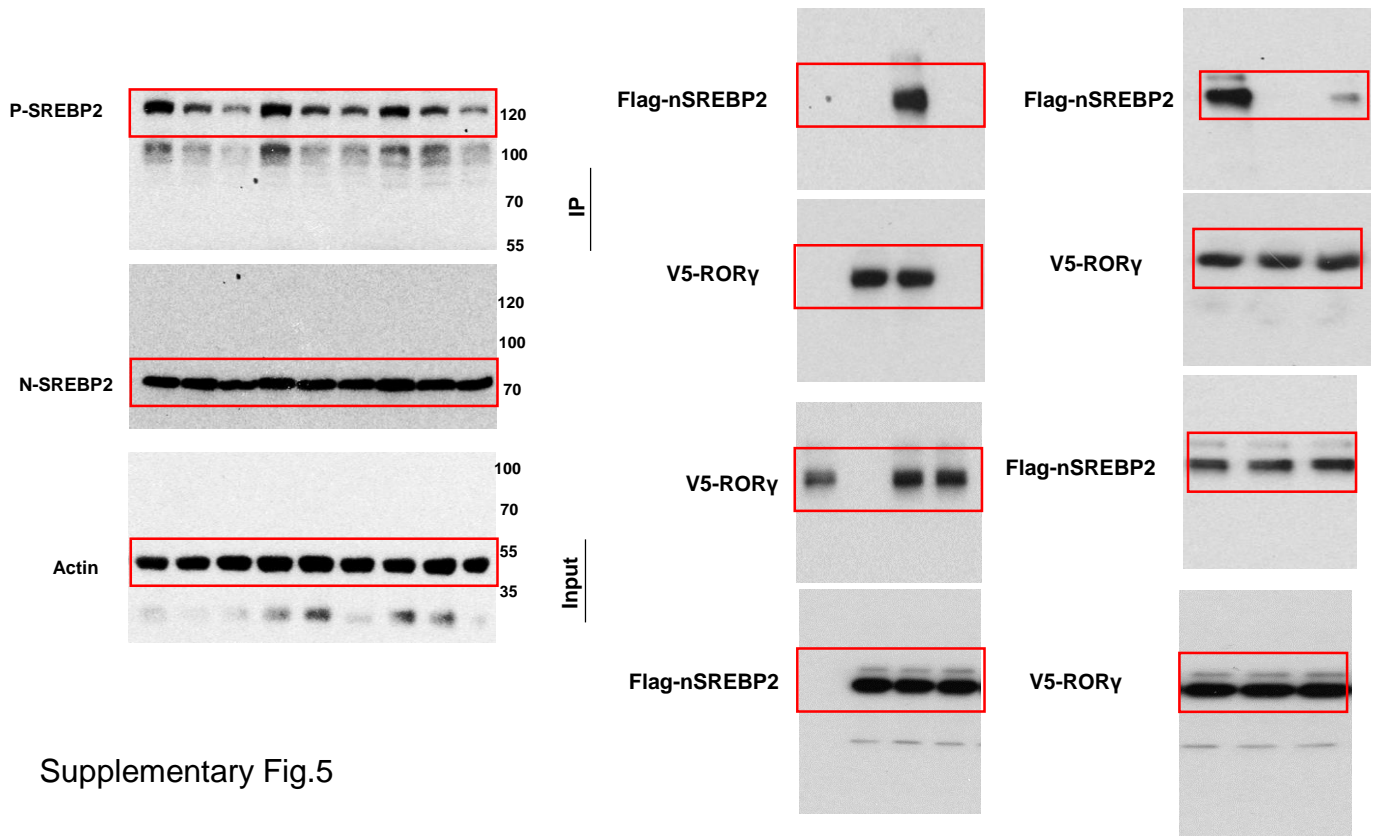

Supplementary Fig.5

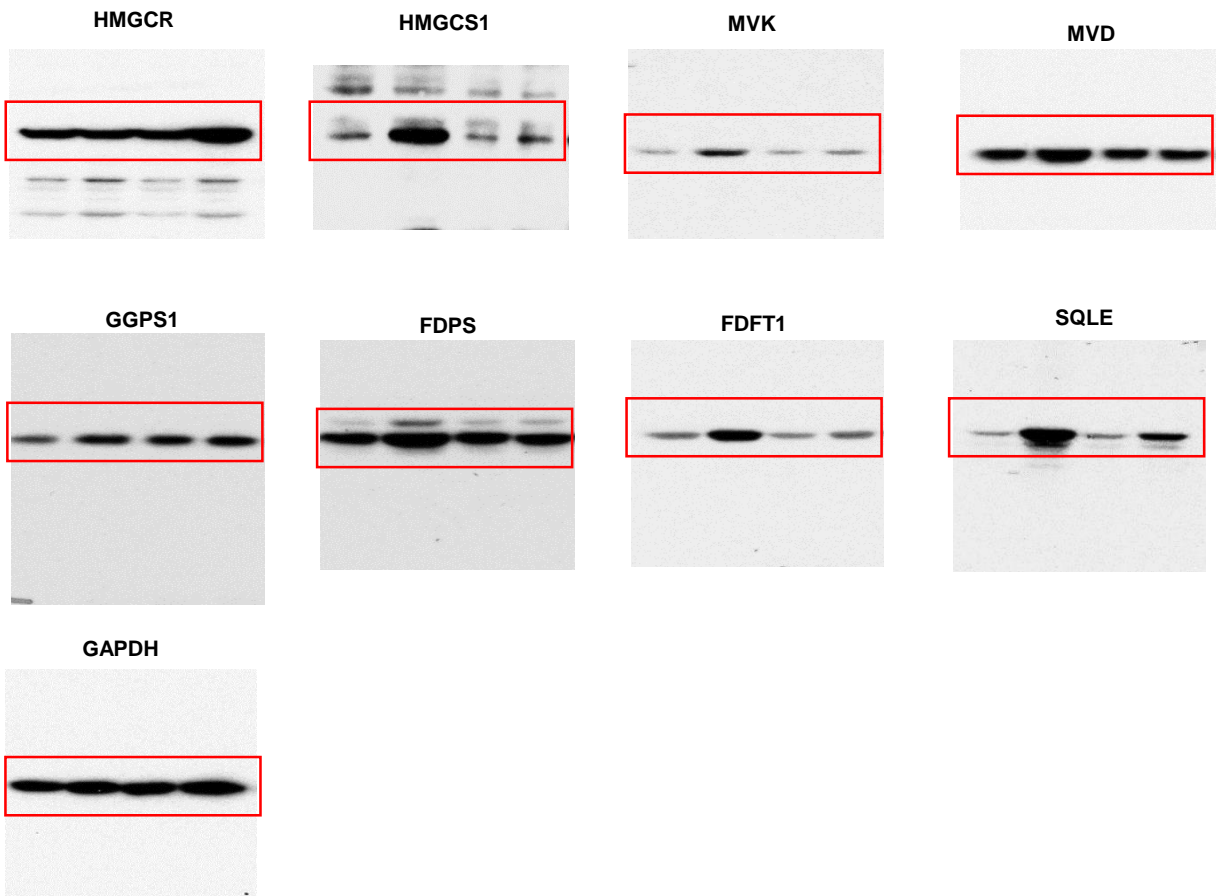

Supplementary Fig.7

HMGCS1

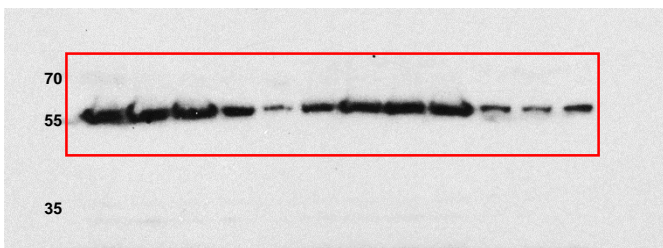

MVK

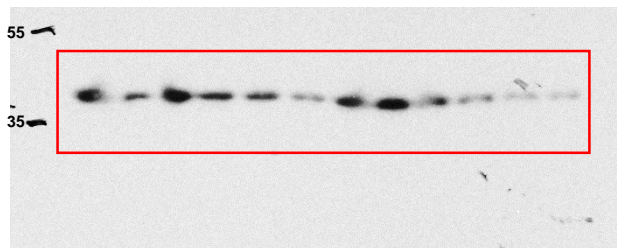

MVD

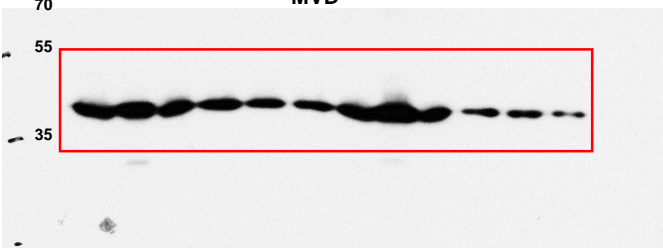

SQLE

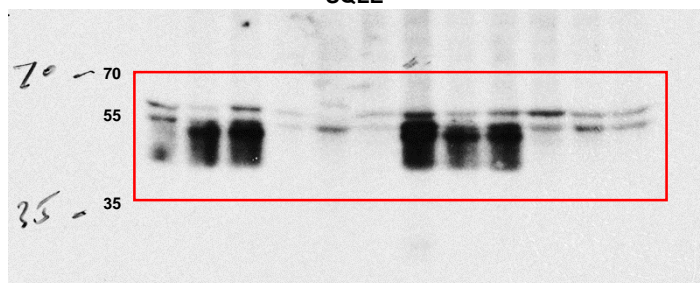

LDLR

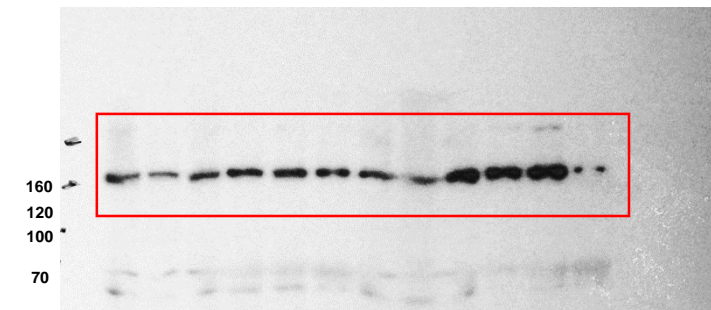

ABCA1

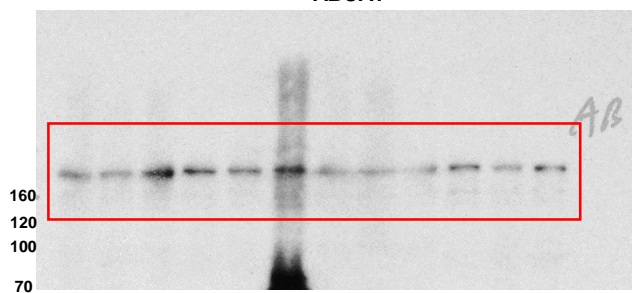

GAPDH

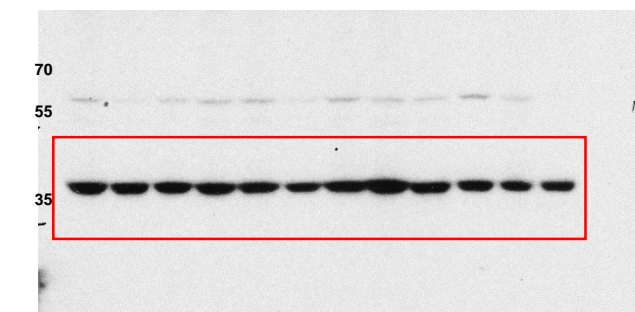

## ROR $\gamma$ antibody validation for ChIP

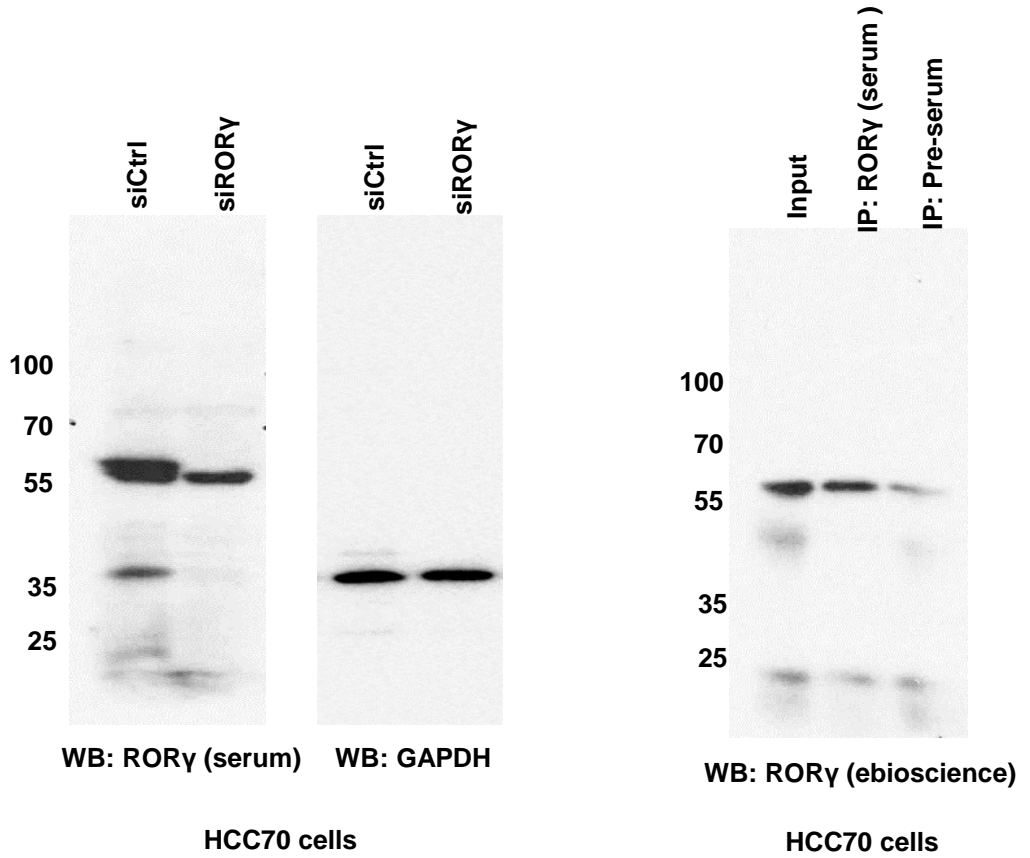

Supplement: 41467_2019_12529_MOESM4_ESM.pdf [file 41467_2019_12529_MOESM4_ESM.pdf]
